# Supplementary material for: Time course of fluid responsiveness in sepsis: the fluid challenge revisiting (FCREV) study
Source: Springer Nature journal article supplement (doi:10.1186/s13054-019-2448-z), 2019-05-16

VTI (cm)

### Persistent responders

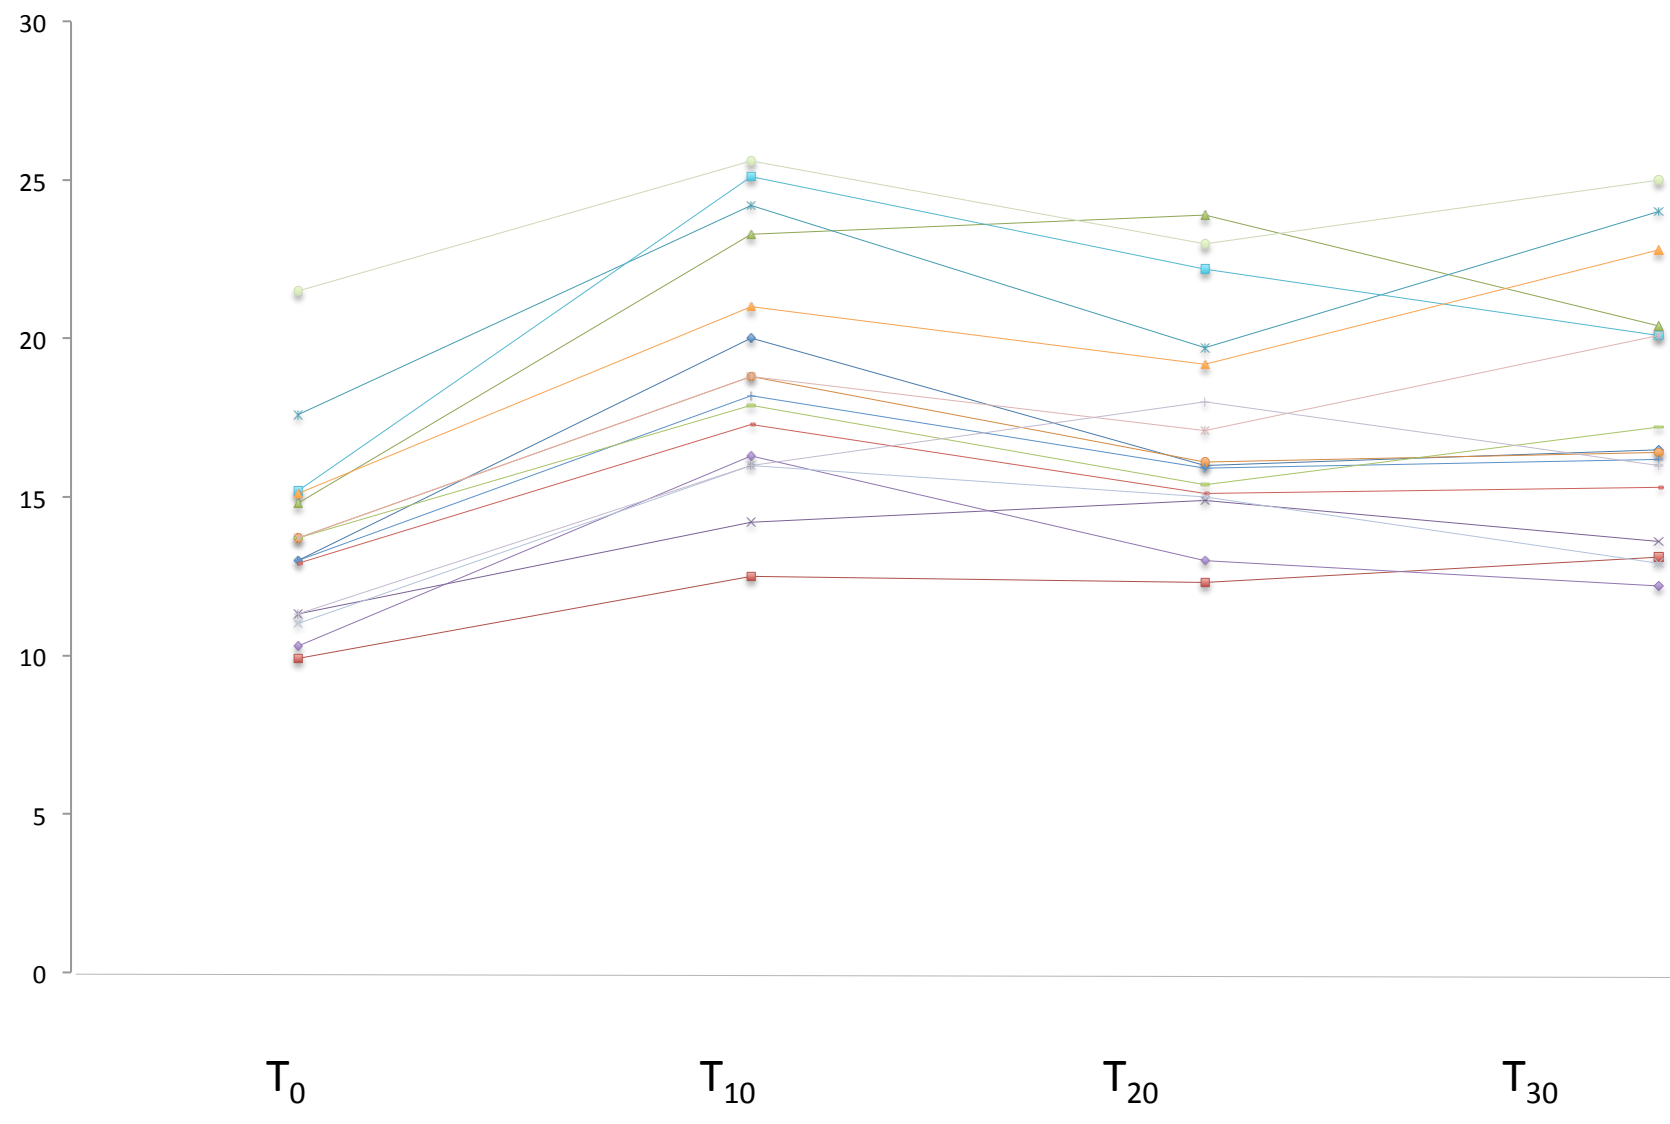

VTI (cm)

### Non responders

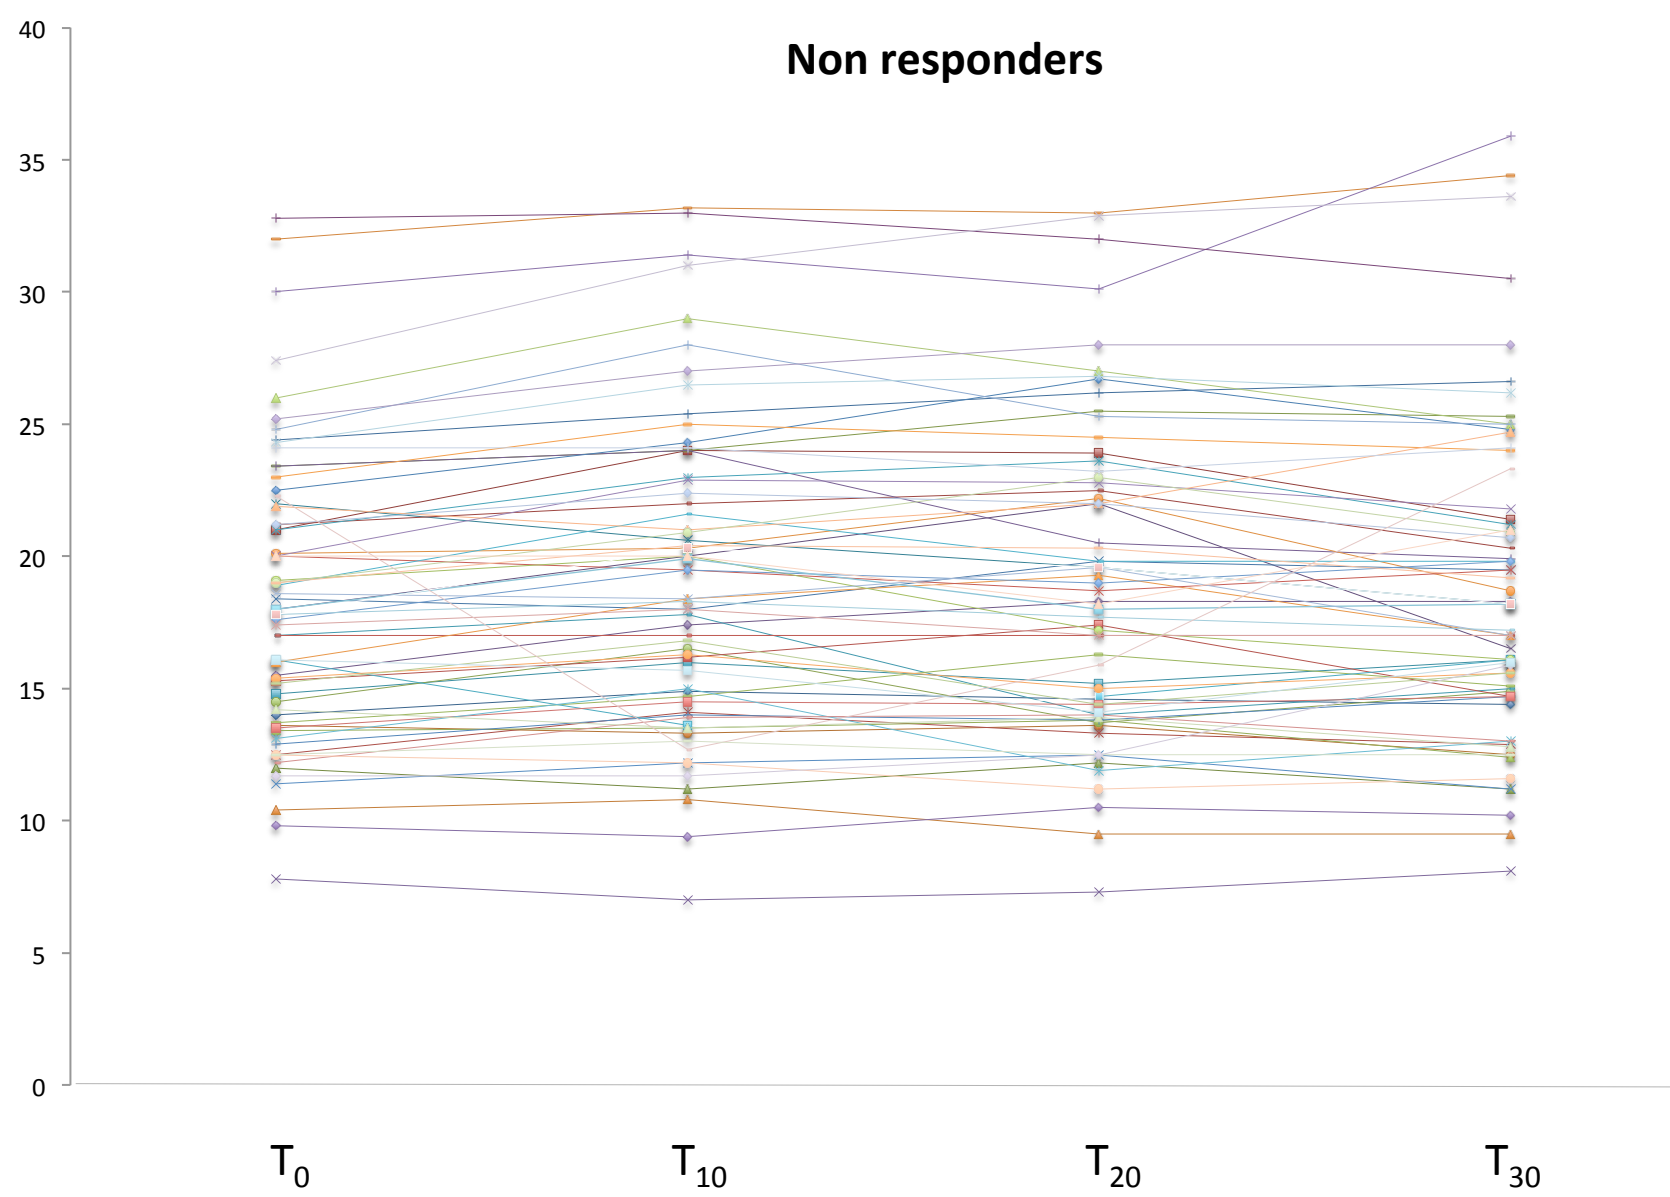

VTI (cm)

### Transient responders

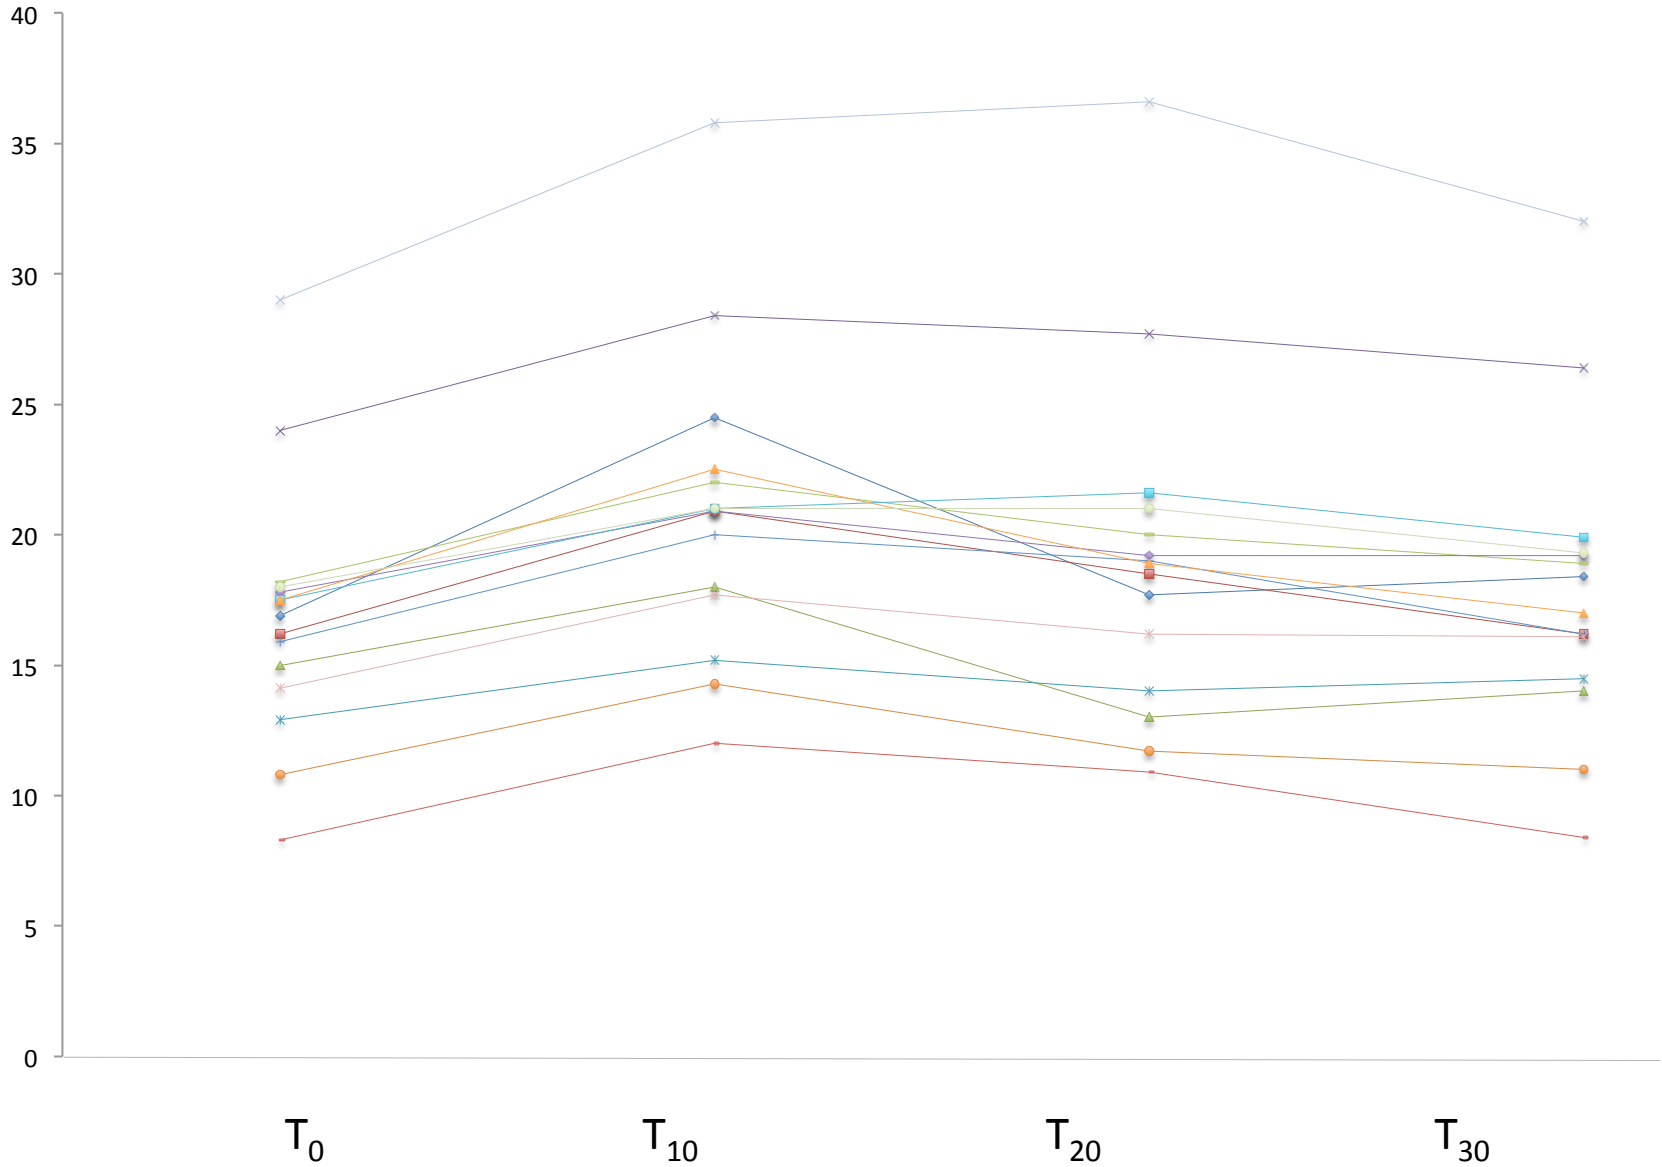

Supplement: MOESM1 [file 16729242]
